# Supplementary material for: A label-free electrochemical DNA biosensor for kanamycin detection based on diblock DNA with poly-cytosine as a high affinity anchor on graphene oxide
Source: Royal Society of Chemistry journal article supplement (doi:10.1039/d0ay00025f), 2020-01-01
Supplement: d0ay00025f1.pdf [file d0ay00025f1.pdf]

## **Supporting Information**

### **Label-free electrochemical DNA biosensor for kanamycin detection based on diblock DNA with poly-cytosine as high affinity anchors on graphene oxide**

Xiaoyan He\*, Huimin Han, Wenyu Shi, Jiandi Dong, Xiong Lu, Wu Yang, Xiaoquan Lu

Key Laboratory of Bioelectrochemistry and Environmental Analysis of Gansu,  
College of Chemistry and Chemical Engineering, Northwest Normal University,  
Lanzhou 730070, P. R. China

\*Corresponding author:

Xiaoyan He

E-mail: hexy09@163.com

Tel: +86-13919132753

Supporting materials: Fig. S1- S3.

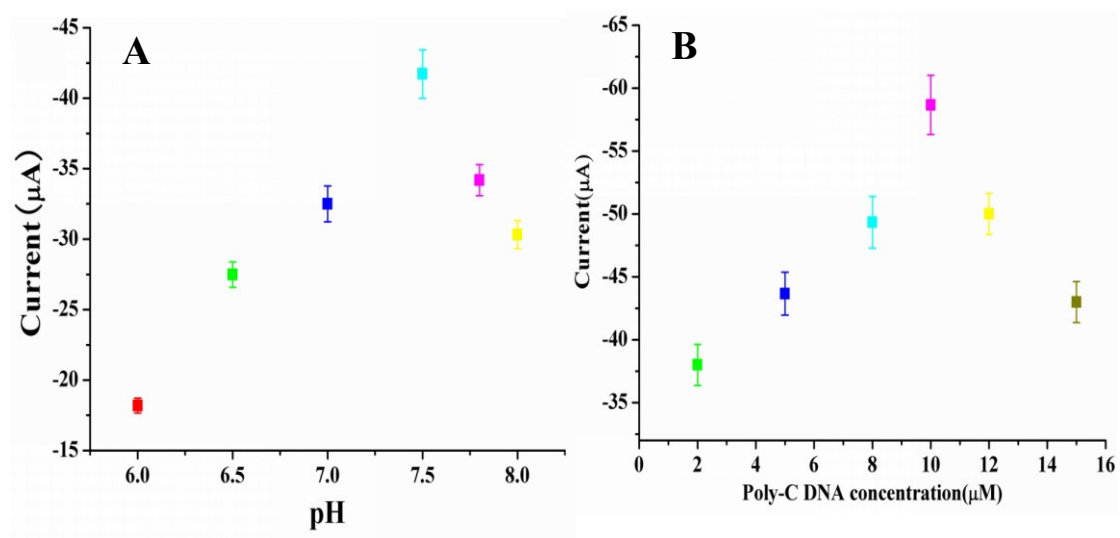

**Fig. S1.** The influences of the pH during physical adsorption (A) and poly-C DNA concentration (B) on the electrochemical DNA biosensor.

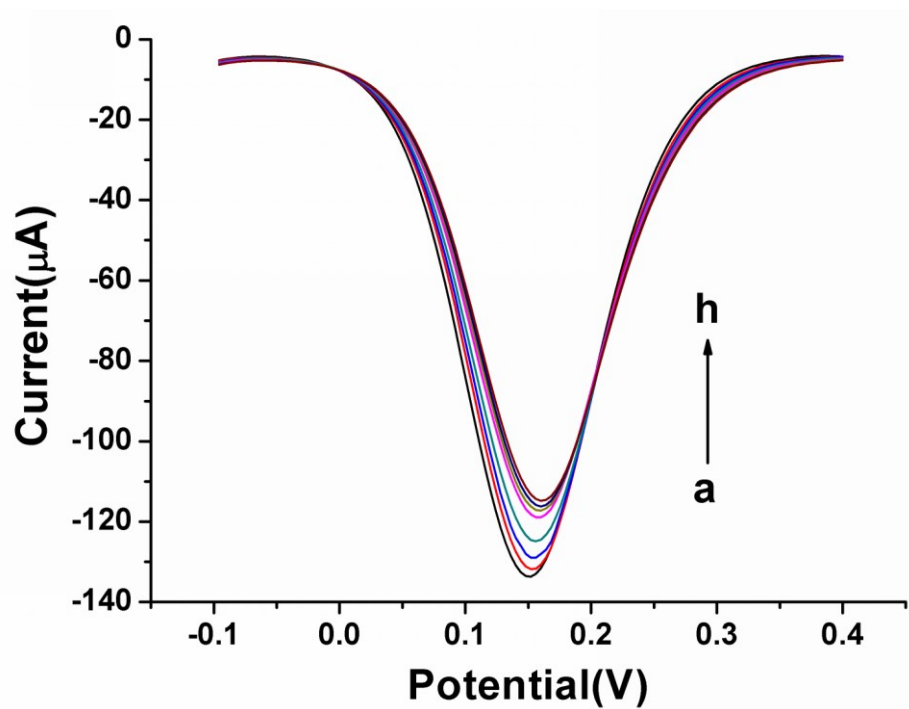

**Fig. S2.** The DPV curves of the DNA biosensor toward different concentrations of KAN at the optimized conditions. Curve a-h correspond to KAN at the concentrations from 0.05 pM to 100 nM.

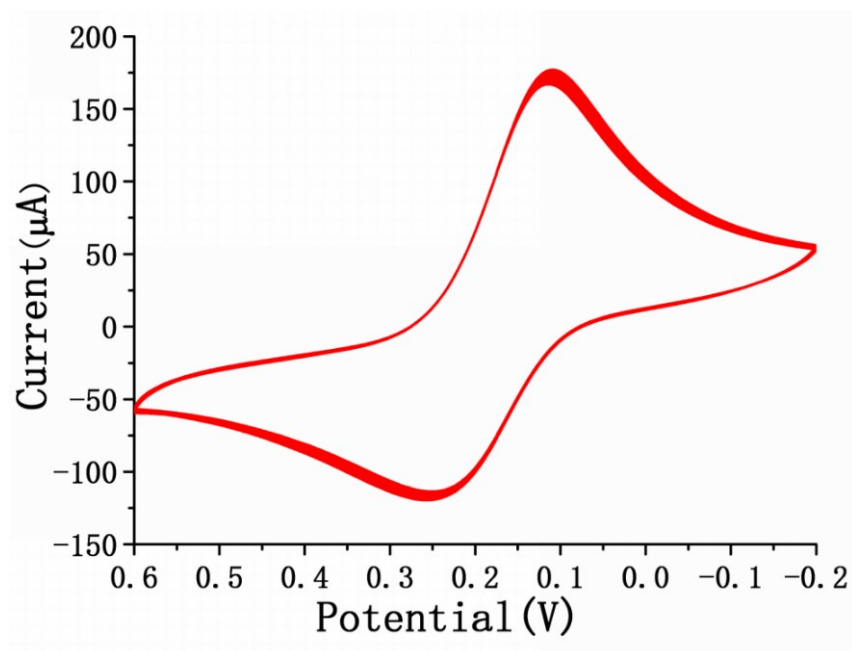

**Fig. S3.** Cyclic voltammograms of the DNA biosensor in the PBS (0.2 M, pH=7.4) solution containing 5.0 mM  $[\text{Fe}(\text{CN})_6]^{3-/4-}$  and 0.1 M KCl for 50 continuous cycles.
